# Supplementary material for: The representational dynamics of task and object processing in humans
Source: eLife journal article supplement (doi:10.7554/elife.32816), 2018-01-31
Supplement: supp [file elife-32816-supp-v1.zip]

Archive with 7 entries (7 files):
- elife_poa_e32816_Transparent_Reporting_File.pdf
- elife_poa_e32816_Figure_5_source_data_1.zip
- elife_poa_e32816_Figure_4_source_data_1.zip
- elife_poa_e32816_Source_code_1.zip
- elife_poa_e32816_Figure_3_source_data_1.zip
- elife_poa_e32816_Figure_6_source_data_1.zip
- elife_poa_e32816_Figure_6_video_1.mp4
